# Supplementary material for: A graphene oxide decorated BZT–CNF composite through hybrid microwave processing: an advanced multifunctional material for superior microwave shielding applications
Source: Royal Society of Chemistry journal article supplement (doi:10.1039/d3ta06292a), 2023-12-19
Supplement: d3ta06292a1.pdf [file d3ta06292a1.pdf]

Supplementary document:

## Graphene oxide decorated BZT- CNF composite through hybrid microwave processing: An advanced multifunctional material for superior microwave shielding application†

Chinmay Chandan Parhi,<sup>a</sup> Avanish Babu Thirumalasetty,<sup>a</sup> Ajit Raymond James,<sup>b</sup> Yogesh Kumar Choukiker,<sup>c</sup> and Madhuri W.\*<sup>d</sup>

<sup>a</sup> Department of Physics, School of Advanced Sciences, Vellore Institute of Technology, Vellore, 632014, Tamil Nadu, India

<sup>b</sup> Ceramic Composite Group, Defense Metallurgical Research Laboratory, Hyderabad, 500058, Telengana, India

<sup>c</sup> School of Electronics Engineering, Vellore Institute of Technology, Vellore, 632014, Tamil Nadu, India

<sup>d</sup> Center for Functional Materials, Vellore Institute of Technology, Vellore, 632014, Tamil Nadu, India

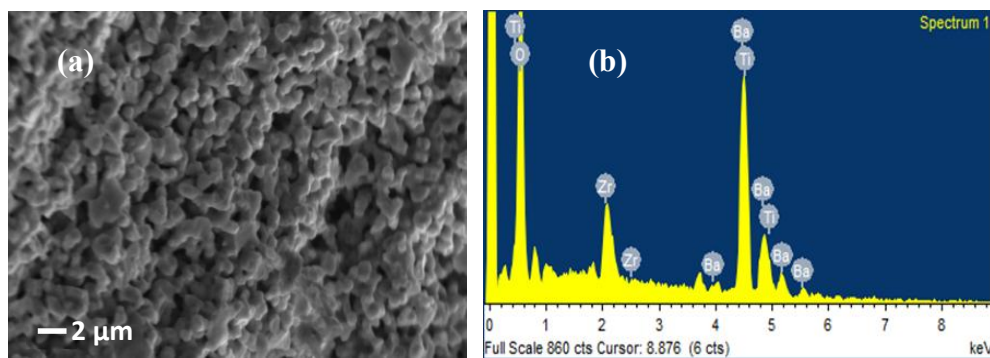

Figure S1: (a) SEM image of microwave sintered BZT (b) EDX for BZT

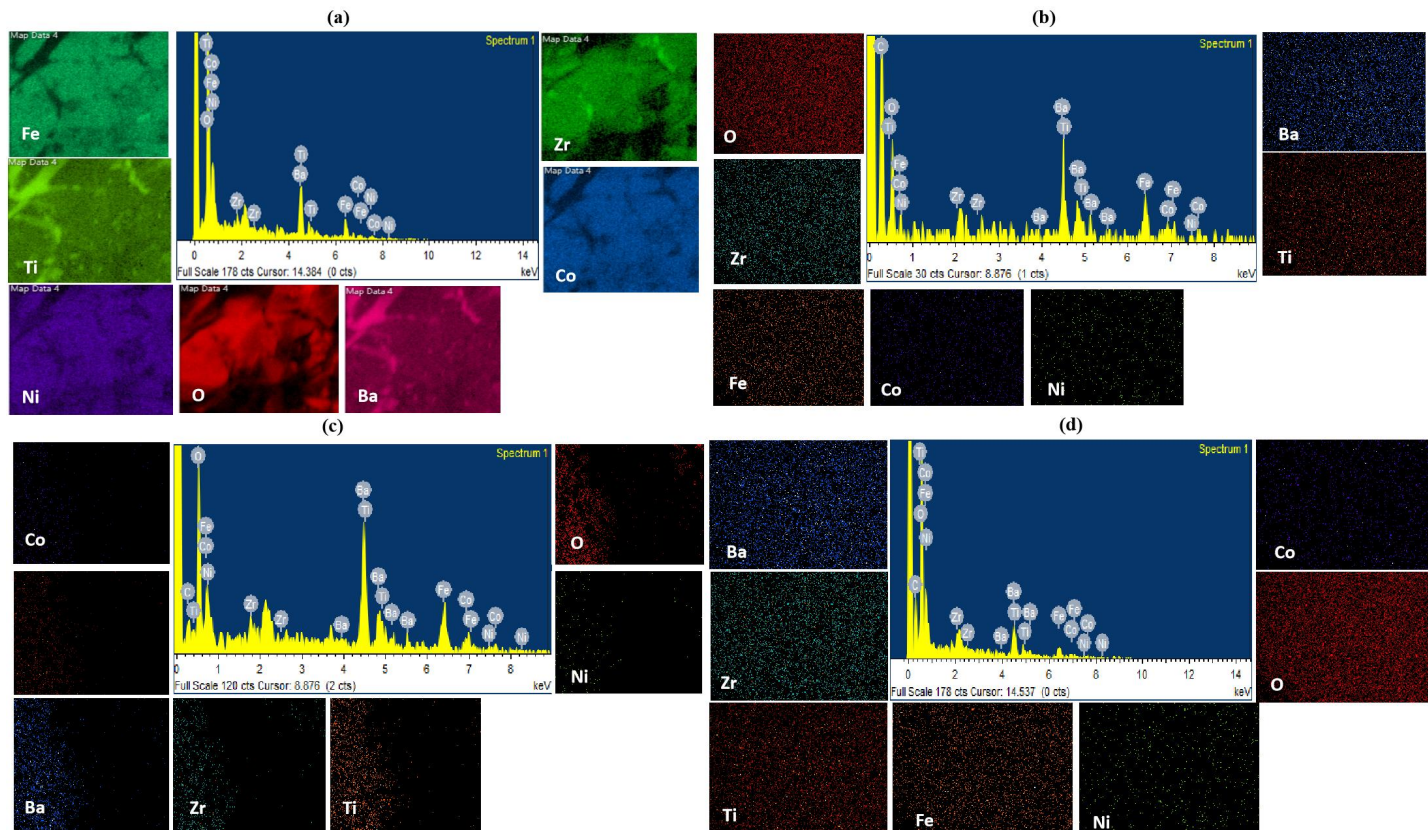

Figure S2: EDX and elemental mapping of 0.5BZT-0.5CNF- $\phi$ % GO ( $\phi=0.5, 1, 1.5$ ) composites (a)  $\phi=0$  (b)  $\phi=0.5$  (c)  $\phi=1$  (d)  $\phi=1.5$

Table S1: Energy storage parameters of GO reinforced magnetoelectric composite at 7.4 kV/cm.

| 0.5BZT+0.5CNF + $\phi$ % GO | Recoverable energy (mJ/cm <sup>3</sup> ) | Energy loss (mJ/cm <sup>3</sup> ) | Efficiency (%) |
|-----------------------------|------------------------------------------|-----------------------------------|----------------|
| $\phi=0$                    | 0.27                                     | 5                                 | 5.15           |
| $\phi=0.5$                  | 0.57                                     | 6.5                               | 8.1            |
| $\phi=1$                    | 1.5                                      | 12                                | 11.11          |
| $\phi=1.5$                  | 2.7                                      | 53                                | 4.84           |

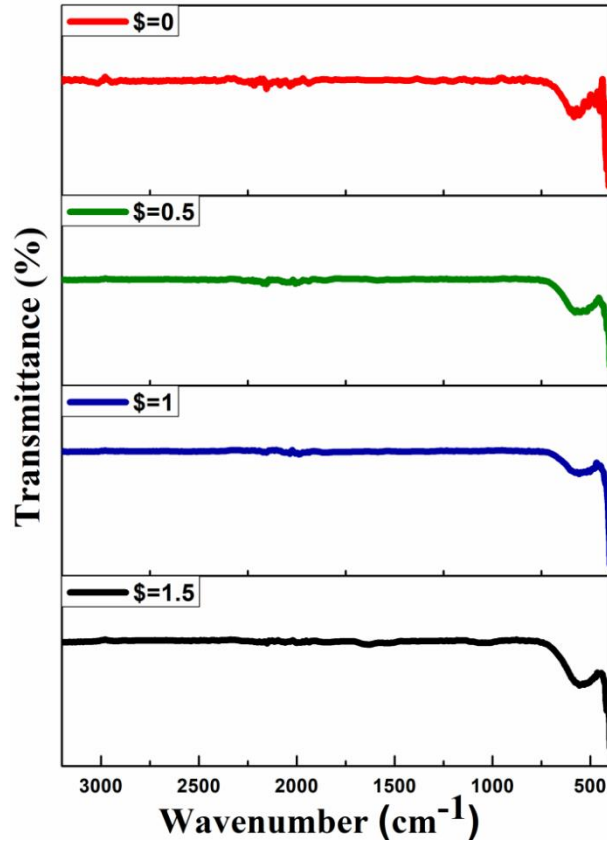

Figure S3: FT-IR spectrum of 0.5BZT-0.5CNF- $x\%$  GO ( $x=0.5, 1, 1.5$ ) magneto-electric composite from  $400\text{ cm}^{-1}$ -  $3500\text{ cm}^{-1}$

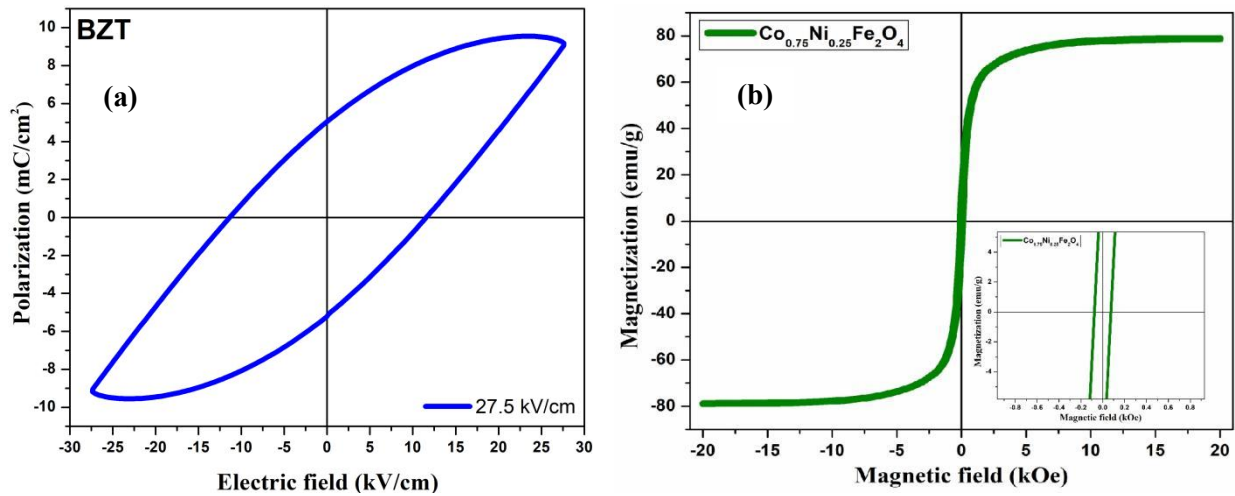

Figure S4: (a) Polarization versus electric field curve for microwave sintered BZT (b) Magnetization as function of magnetic field for CNF
